# Supplementary material for: Semiconducting composite oxide Y2CuO4–5CuO thin films for investigation of photoelectrochemical properties
Source: Royal Society of Chemistry journal article supplement (doi:10.1039/c4dt00719k), 2014-01-01
Supplement: c4dt00719k1.pdf [file c4dt00719k1.pdf]

### SUPPLEMENTARY MATERIALS ###

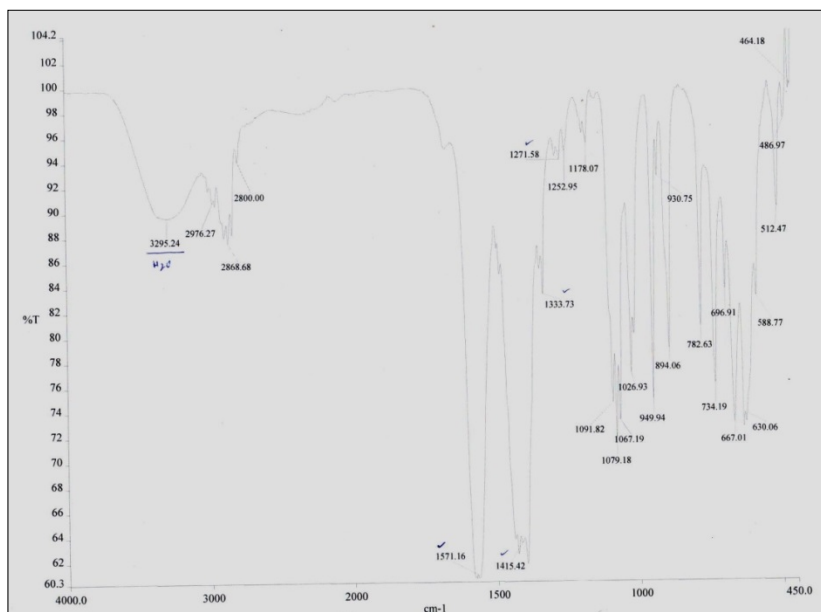

Fig. S1. FT-IR of precursor 1

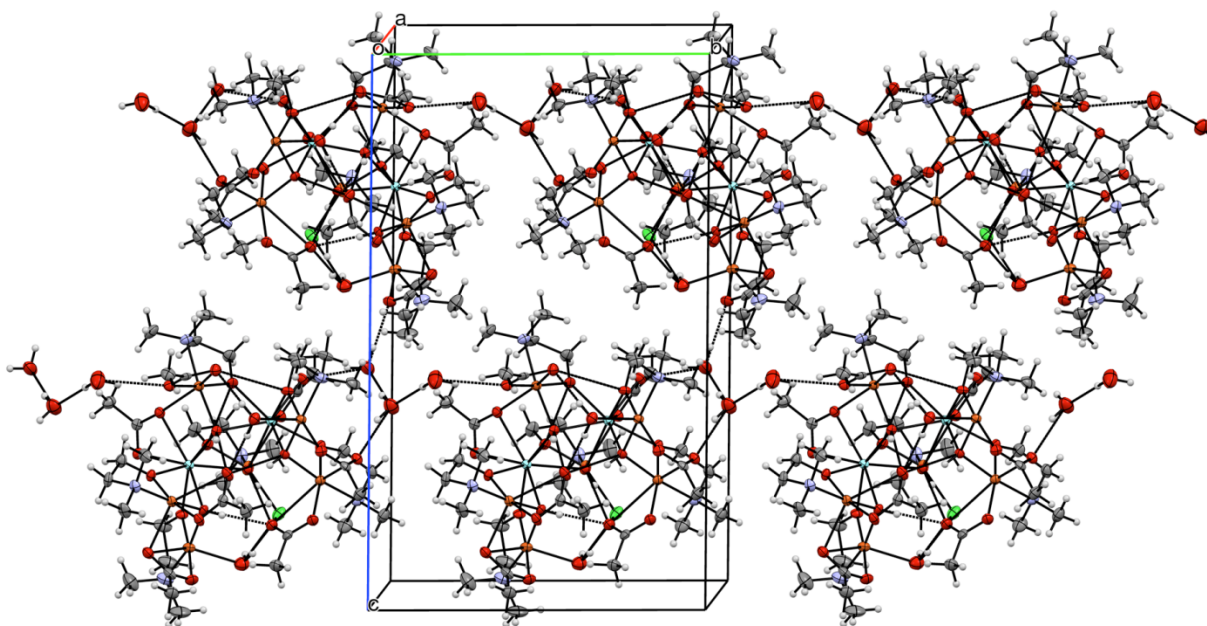

Fig S2a. Molecules of the Y-Cu complex, connected via hydrogen bonding to water solvent clusters (H<sub>2</sub>O)<sub>3</sub> into a two-dimensional network parallel to the (bc) plane

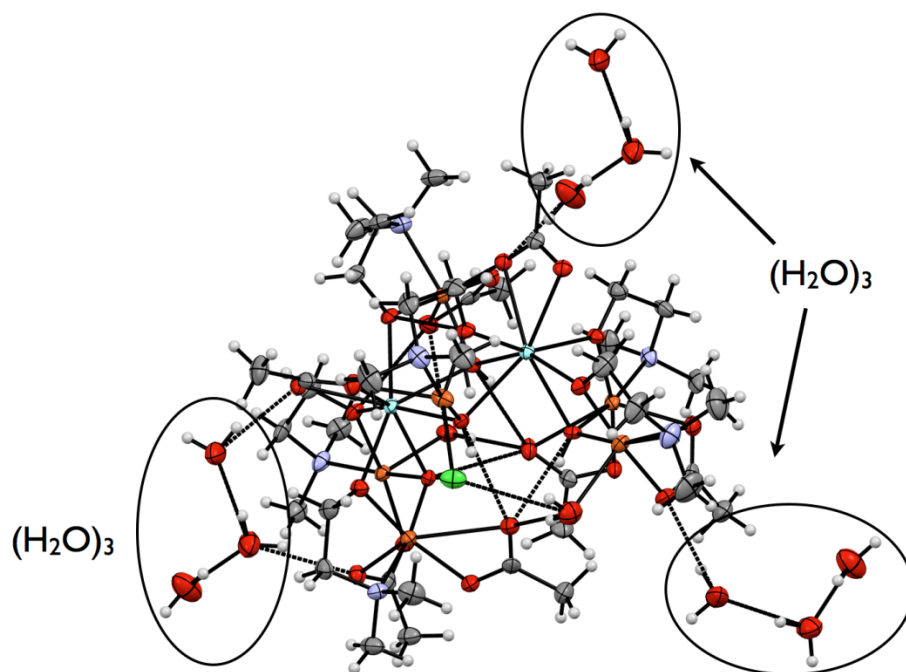

**Fig. S2b.** Representation of (H<sub>2</sub>O)<sub>3</sub> water clusters attached to one molecule of the Y-Cu complex.

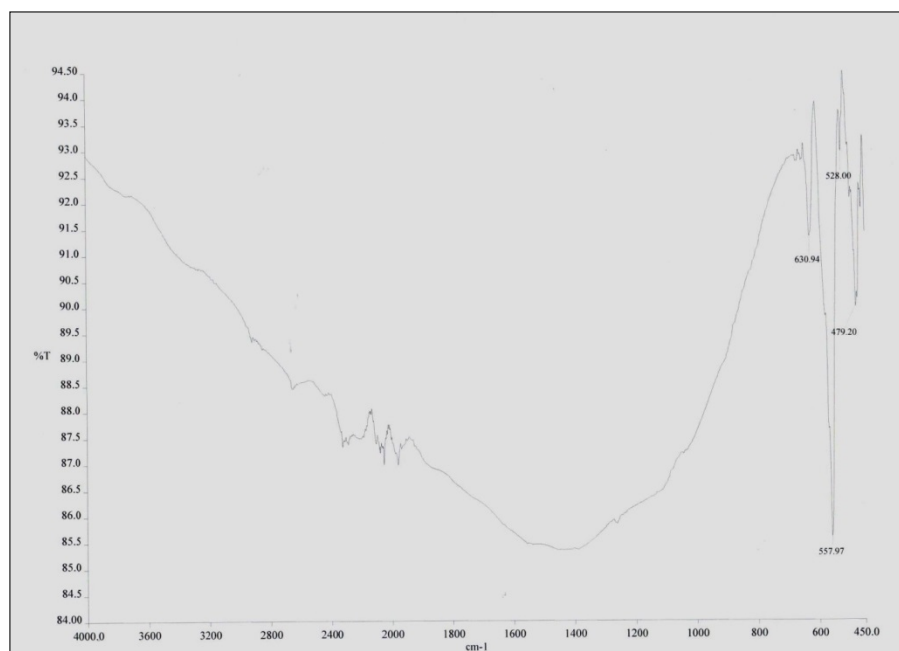

**Fig. S3a.** FT-IR of residue of decomposed precursor **1** under oxygen ambient.

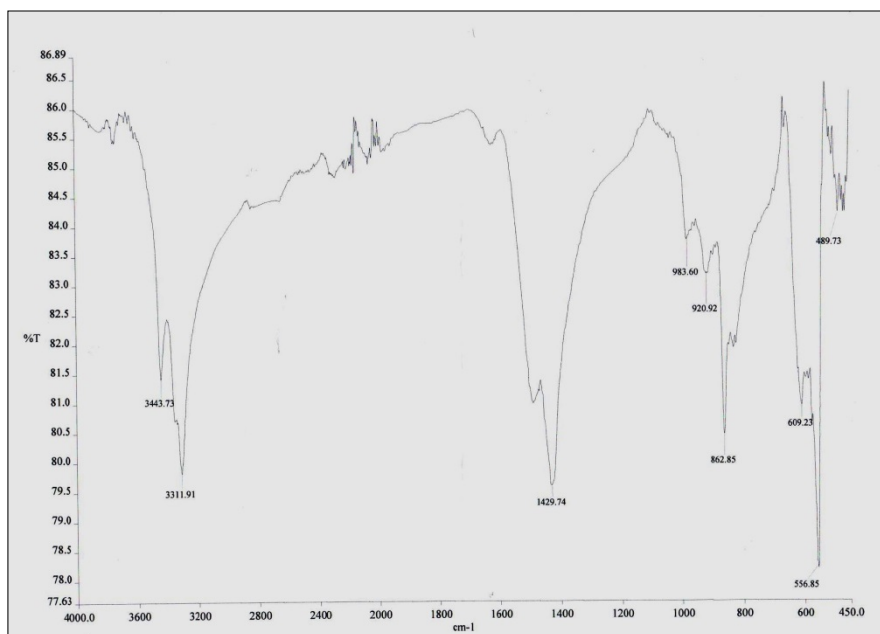

**Fig. S3b.** FT-IR of residue of decomposed precursor **1** under nitrogen ambient.

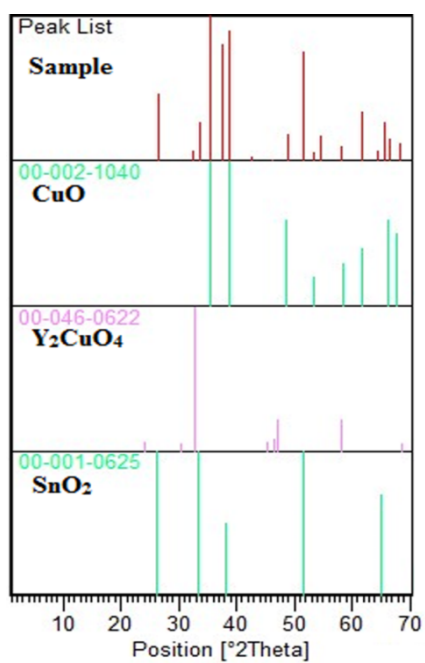

**Fig. S4.** Stick pattern matching of XRD of Y<sub>2</sub>CuO<sub>4</sub>-5CuO thin film with the standard ICDD pattern of CuO, Y<sub>2</sub>CuO<sub>4</sub> and SnO<sub>2</sub> respectively.

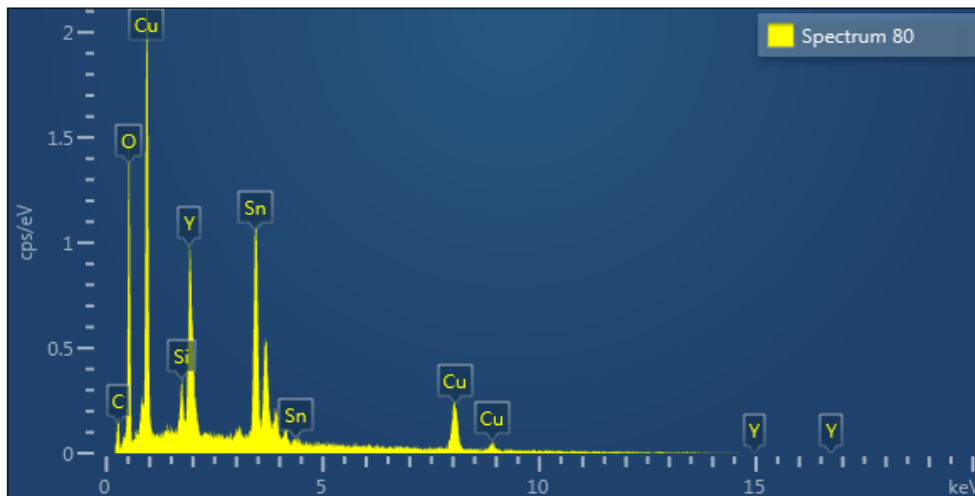

**Fig. S5a.** Large area scanned EDX of thin films formed from toluene.

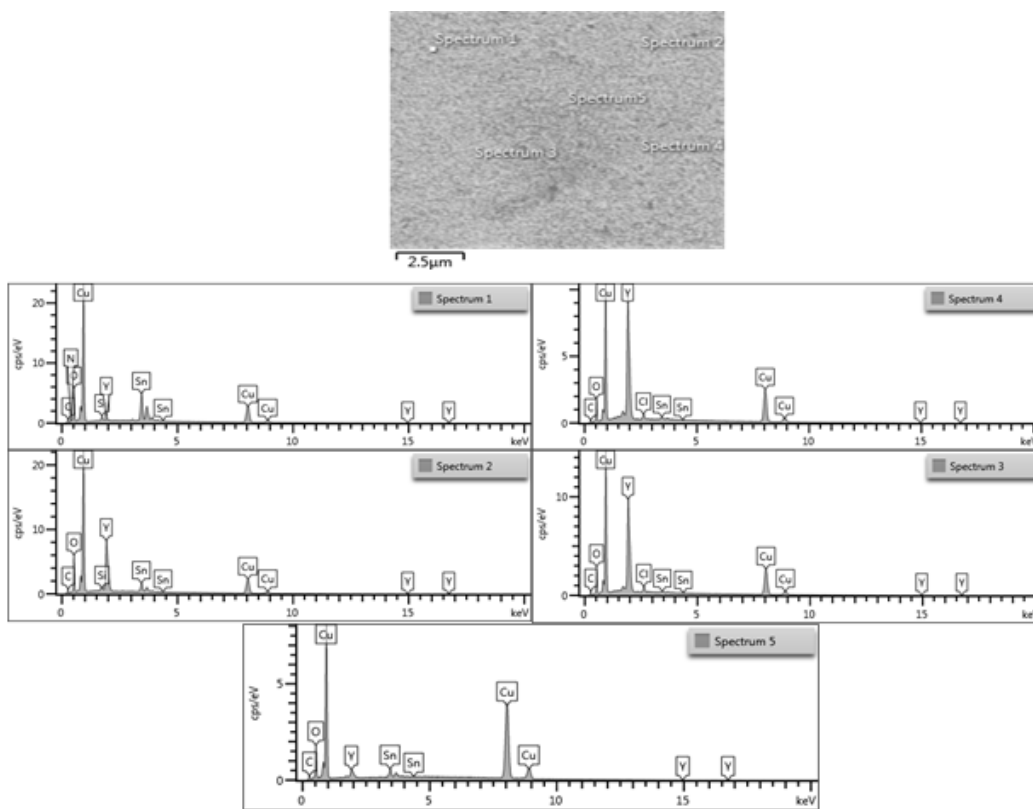

**Fig. S5b.** Spot EDX analysis of  $\text{Y}_2\text{CuO}_4\text{-5CuO}$  composite thin films at five different places.

Table S1. Metal-Metal distances (Å) for **1**

---

|            |           |
|------------|-----------|
| Y(1)-Y(2)  | 3.8342(7) |
| Y(1)-Cu(1) | 3.3925(8) |
| Y(1)-Cu(2) | 3.3497(7) |
| Y(1)-Cu(3) | 3.5611(7) |
| Y(1)-Cu(6) | 3.3093(7) |
| Y(2)-Cu(3) | 3.3616(7) |
| Y(2)-Cu(4) | 3.4143(7) |
| Y(2)-Cu(5) | 3.3479(7) |
| Y(2)-Cu(6) | 3.6182(7) |

---
